# Supplementary material for: Genetic Predisposition to Long-Term Nondiabetic Deteriorations in Glucose Homeostasis: Ten-Year Follow-Up of the GLACIER Study
Source: PubMed Central journal article supplement — Diabetes. 2010 Sep 24;60(1):345–54. doi: 10.2337/db10-0933 (PMC3012192; doi:10.2337/db10-0933), 2010-09-24
Supplement: supp_db10-0933_db100933onlineappendix.pdf [file supp_db10-0933_db100933onlineappendix.pdf]

## Supplementary appendix: Full list of all MAGIC investigators and their affiliations

Josée Dupuis<sup>1,20,99</sup>, Claudia Langenberg<sup>30,99</sup>, Inga Prokopenko<sup>4,50,99</sup>, Richa Saxena<sup>6,70,99</sup>, Nicole Soranzo<sup>8,90,99</sup>, Anne U Jackson<sup>10</sup>, Eleanor Wheeler<sup>11</sup>, Nicole LGlazer<sup>12</sup>, Nabila Bouatia-Naji<sup>13</sup>, Anna LGloyn<sup>4</sup>, Cecilia MLindgren<sup>4,5</sup>, Reedik Mägi<sup>4,5</sup>, Andrew P Morris<sup>5</sup>, Joshua Randall<sup>5</sup>, Toby Johnson<sup>14-16</sup>, Paul Elliott<sup>17,176</sup>, Denis Rybin<sup>18</sup>, Gudmar Thorleifsson<sup>19</sup>, Valgerdur Steinthorsdottir<sup>19</sup>, Peter Henneman<sup>20</sup>, Harald Grallert<sup>21</sup>, Abbas Dehghan<sup>22</sup>, Jouke Jan Hottenga<sup>23</sup>, Christopher S Franklin<sup>24</sup>, Pau Navarro<sup>25</sup>, Kijoung Song<sup>26</sup>, Anuj Goel<sup>5,27</sup>, John R B Perry<sup>28</sup>, Josephine MEgan<sup>29</sup>, Taina Lajunen<sup>30</sup>, Niels Grarup<sup>31</sup>, Thomas Sparsø<sup>31</sup>, Alex Doney<sup>32</sup>, Benjamin F Voight<sup>6,7</sup>, Heather MStringham<sup>10</sup>, Man Li<sup>33</sup>, Stavroula Kanoni<sup>34</sup>, Peter Shrader<sup>35</sup>, Christine Cavalcanti-Proença<sup>13</sup>, Meena Kumari<sup>36</sup>, Lu Qi<sup>37</sup>, Nicholas J Timpson<sup>38</sup>, Christian Gieger<sup>21</sup>, Carina Zabena<sup>39</sup>, Ghislain Rocheleau<sup>40,41</sup>, Erik Ingelsson<sup>42,43</sup>, Ping An<sup>44</sup>, Jeffrey O'Connell<sup>45</sup>, Jian'an Luan<sup>3</sup>, Amanda Elliott<sup>6,7</sup>, Steven A McCarroll<sup>6,7</sup>, Felicity Payne<sup>11</sup>, Rosa Maria Roccascocca<sup>11</sup>, François Pattou<sup>46</sup>, Praveen Sethupathy<sup>47</sup>, Kristin Ardlie<sup>48</sup>, Yavuz Ariyurek<sup>49</sup>, Beverley Balkau<sup>50</sup>, Philip Barter<sup>51</sup>, John P Beilby<sup>52,53</sup>, Yoav Ben-Shlomo<sup>54</sup>, Rafn Benediktsson<sup>55,56</sup>, Amanda J Bennett<sup>4</sup>, Sven Bergmann<sup>14,16</sup>, Murielle Bochud<sup>15</sup>, Eric Boerwinkle<sup>57</sup>, Amélie Bonnefond<sup>13</sup>, Lori LBonnycastle<sup>47</sup>, Knut Borch-Johnsen<sup>58,59</sup>, Yvonne Böttcher<sup>60</sup>, Eric Brunner<sup>36</sup>, Suzannah J Bumpstead<sup>8</sup>, Guillaume Charpentier<sup>61</sup>, Yii-Der Ida Chen<sup>62</sup>, Peter Chines<sup>47</sup>, Robert Clarke<sup>63</sup>, Lachlan J MCoIn<sup>17</sup>, Matthew NCooper<sup>64</sup>, Marilyn Cornelis<sup>37</sup>, Gabe Crawford<sup>6</sup>, Laura Crisponi<sup>65</sup>, Ian NMDay<sup>38</sup>, Eco J Cde Geus<sup>23</sup>, Jerome Delplanque<sup>13</sup>, Christian Dina<sup>13</sup>, Michael R Erdos<sup>47</sup>, Annette CFedson<sup>64,66</sup>, Antje Fischer-Rosinsky<sup>67,68</sup>, Nita GForouhi<sup>3</sup>, Caroline SFox<sup>2,69</sup>, Rune Frants<sup>70</sup>, Maria Grazia Franzosi<sup>71</sup>, Pilar Galan<sup>72</sup>, Mark OGoodarzi<sup>62</sup>, Jürgen Graessler<sup>73</sup>, Christopher J Groves<sup>4</sup>, Scott Grundy<sup>74</sup>, Rhian Gwilliam<sup>8</sup>, Ulf Gyllensten<sup>75</sup>, Samy Hadjadj<sup>76</sup>, Göran Hallmans<sup>77</sup>, Naomi Hammond<sup>8</sup>, Xijing Han<sup>10</sup>, Anna-Liisa Hartikainen<sup>78</sup>, Neelam Hassanali<sup>4</sup>, Caroline Hayward<sup>25</sup>, Simon CHeath<sup>79</sup>, Serge Hercberg<sup>80</sup>, Christian Herder<sup>81</sup>, Andrew A Hicks<sup>82</sup>, David R Hillman<sup>66,83</sup>, Aroon DHingorani<sup>36</sup>, Albert Hofman<sup>22</sup>, Jennie Hui<sup>52,84</sup>, Joe Hung<sup>85,86</sup>, Bo Isomaa<sup>87,88</sup>, Paul R V Johnson<sup>4,89</sup>, Torben Jørgensen<sup>90,91</sup>, Antti Jula<sup>92</sup>, Marika Kaakinen<sup>93</sup>, Jaakko Kaprio<sup>94-96</sup>, Y Antero Kesaniemi<sup>97</sup>, Mika Kivimäki<sup>36</sup>, Beatrice Knight<sup>98</sup>, Seppo Koskinen<sup>99</sup>, Peter Kovacs<sup>100</sup>, Kirsten Ohm Kyvik<sup>101</sup>, GMark Lathrop<sup>79</sup>, Debbie A Lawlor<sup>38</sup>, Olivier Le Bacquer<sup>13</sup>, Cécile Lecoeur<sup>13</sup>, Yun Li<sup>10</sup>, Valeriya Lyssenko<sup>102</sup>, Robert Mahley<sup>103</sup>, Massimo Mangino<sup>9</sup>, Alisa KManning<sup>1</sup>, María Teresa Martínez-Larrad<sup>39</sup>, Jarred B McAteer<sup>6,104,105</sup>, Laura J McCulloch<sup>4</sup>, Ruth McPherson<sup>106</sup>, Christa Meisinger<sup>21</sup>, David Melzer<sup>28</sup>, David Meyre<sup>13</sup>, Braxton DMitchell<sup>45</sup>, Mario A Morcken<sup>47</sup>, Sutapa Mukherjee<sup>66,83</sup>, Silvia Naitza<sup>65</sup>, Narisu Narisu<sup>47</sup>, Matthew J Neville<sup>4,107</sup>, Ben A Oostra<sup>108</sup>, Marco Orrù<sup>65</sup>, Ruth Pakyz<sup>45</sup>, Colin NA Palmer<sup>109</sup>, Giuseppe Paolisso<sup>110</sup>, Cristian Pattaro<sup>82</sup>, Daniel Pearson<sup>47</sup>, John F Peden<sup>5,27</sup>, Nancy LPedersen<sup>42</sup>, Markus Perola<sup>96,111,112</sup>, Andreas F H Pfeiffer<sup>67,68</sup>, Irene Pichler<sup>82</sup>, Ozren Polasek<sup>113</sup>, Danielle Posthuma<sup>23,114</sup>, Simon CPotter<sup>8</sup>, Anneli Pouta<sup>115</sup>, Michael A Province<sup>44</sup>, Bruce MPsaty<sup>116,117</sup>, Wolfgang Rathmann<sup>118</sup>, Nigel WRayner<sup>4,5</sup>, Kenneth Rice<sup>119</sup>, Samuli Ripatti<sup>96,111</sup>, Fernando Rivadeneira<sup>22,120</sup>, Michael Roden<sup>81,121</sup>, Olov Rolandsson<sup>122</sup>, Anelli Sandbaek<sup>123</sup>, Manjinder Sandhu<sup>3,124</sup>, Serena Sanna<sup>65</sup>, Avan Aihie Sayer<sup>125</sup>, Paul Scheet<sup>126</sup>, Laura J Scott<sup>10</sup>, Udo Seedorf<sup>127</sup>, Stephen J Sharp<sup>3</sup>, Beverley Shields<sup>98</sup>, Gunnar Sigurdsson<sup>55,56</sup>, Eric J GSijbrands<sup>22,120</sup>, Angela Silveira<sup>128</sup>, Laila Simpson<sup>64,66</sup>, Andrew Singleton<sup>129</sup>, Nicholas LSmith<sup>130,131</sup>, Ulla Sovio<sup>17</sup>, Amy Swift<sup>47</sup>, Holly Syddall<sup>125</sup>, Ann-Christine Syvänen<sup>132</sup>, Toshiko Tanaka<sup>133,134</sup>, Barbara Thorand<sup>21</sup>, Jean Tichet<sup>135</sup>, Anke Tönjes<sup>60,136</sup>, Tiinamaija Tuomi<sup>87,137</sup>, André GUitterlinden<sup>22,120</sup>, Ko Willems van Dijk<sup>70,138</sup>, Mandy van Hoek<sup>120</sup>, Dhiraj Varma<sup>8</sup>, Sophie Visvikis-Siest<sup>139</sup>, Veronique Vitart<sup>25</sup>, Nicole Vogelzangs<sup>140</sup>, Gérard Waeber<sup>141</sup>, Peter J Wagner<sup>96,111</sup>, Andrew Walley<sup>142</sup>, GBragi Walters<sup>19</sup>, Kim LWARD<sup>64,66</sup>, Hugh Watkins<sup>5,27</sup>, Michael NWeedon<sup>28</sup>, Sarah H Wild<sup>24</sup>, Gonneke Willemsen<sup>23</sup>, Jaqueline CMWitteman<sup>22</sup>, John WGYarnell<sup>143</sup>, Eleftheria Zeggini<sup>5,8</sup>, Diana Zelenika<sup>79</sup>, Björn Zethelius<sup>43,144</sup>, Guangju Zhai<sup>9</sup>, Jing Hua Zhao<sup>3</sup>, MCarola Zillikens<sup>120</sup>, DIAGRAMConsortium<sup>145</sup>, GIANTConsortium<sup>145</sup>, Global BPgen Consortium<sup>145</sup>, Ingrid B Borecki<sup>44</sup>, Ruth J F Loos<sup>3</sup>, Pierre Meneton<sup>80</sup>, Patrik KEMagnusson<sup>42</sup>, David MNathan<sup>104,105</sup>, Gordon H Williams<sup>69,105</sup>, Andrew THattersley<sup>98</sup>, Kaisa Silander<sup>96,111</sup>, Veikko Salomaa<sup>146</sup>, George Davey Smith<sup>38</sup>, Stefan R Bornstein<sup>73</sup>, Peter Schwarz<sup>73</sup>, Joachim Spranger<sup>67,68</sup>, Fredrik Karpe<sup>4,107</sup>, Alan R Shuldiner<sup>45</sup>, Cyrus Cooper<sup>125</sup>, George V Dedoussis<sup>34</sup>, Manuel Serrano-Ríos<sup>39</sup>, Andrew DMorris<sup>109</sup>, Lars Lind<sup>132</sup>, Lyle J Palmer<sup>64,66,84</sup>, Frank B Hu<sup>47,148</sup>, Paul WFranks<sup>149</sup>, Shah Ebrahim<sup>150</sup>, Michael Marmot<sup>36</sup>, WH Linda Kao<sup>33,151,152</sup>, James SPankow<sup>153</sup>, Michael J Sampson<sup>154</sup>, Johanna Kuusisto<sup>155</sup>, Markku Laakso<sup>155</sup>, Torben Hansen<sup>31,156</sup>, Oluf Pedersen<sup>31,59,157</sup>, Peter Paul Pramstaller<sup>82,158,159</sup>, H Erich Wichmann<sup>21,160,161</sup>, Thomas Illig<sup>21</sup>, Igor Rudan<sup>24,162,163</sup>, Alan F Wright<sup>25</sup>, Michael Stumvoll<sup>60</sup>, Harry Campbell<sup>24</sup>, James F Wilson<sup>24</sup>, Anders Hamsten on behalf of Procardis Consortium<sup>128</sup>, Richard NBergman<sup>164</sup>, Thomas A Buchanan<sup>164,165</sup>, Francis SCollins<sup>47</sup>, Karen LMohlke<sup>166</sup>, Jaakko Tuomilehto<sup>94,167,168</sup>, Timo TValle<sup>167</sup>, David Altschuler<sup>6,7,104,105</sup>, Jerome I Rotter<sup>62</sup>, David SSiscovick<sup>169</sup>, Brenda WJ H Penninx<sup>140</sup>, Dorret I Boomsma<sup>23</sup>, Panos Deloukas<sup>8</sup>, Timothy DSpector<sup>8,9</sup>, Timothy MFrayling<sup>28</sup>, Luigi Ferrucci<sup>170</sup>, Augustine Kong<sup>19</sup>, Unnur Thorsteinsdottir<sup>19,171</sup>, Kari Stefansson<sup>19,171</sup>, Cornelia Mvan Duijn<sup>22</sup>, Yurii SAulchenko<sup>22</sup>, Antonio Cao<sup>65</sup>, Angelo Scuteri<sup>172,177</sup>, David Schlessinger<sup>47</sup>, Manuela Uda<sup>65</sup>, Aimo Ruokonen<sup>173</sup>, Marjo-Riitta

Jarvelin<sup>17,93,174</sup>, Dawn MWaterworth<sup>26</sup>, Peter Vollenweider<sup>141</sup>, Leena Peltonen<sup>8,48,96,111,112</sup>, Vincent Mooser<sup>26</sup>, Goncalo R Abecasis<sup>10</sup>, Nicholas J Wareham<sup>3</sup>, Robert Sladek<sup>40,41</sup>, Philippe Froguel<sup>13,142</sup>, Richard MWatanabe<sup>164,175</sup>, James B Meigs<sup>35,105</sup>, Leif Groop<sup>102</sup>, Michael Boehnke<sup>10</sup>, Mark I McCarthy<sup>4,5,107</sup>, Jose CFlorez<sup>6,7,104,105</sup> & Inês Barroso<sup>11</sup> for the MAGIC investigators

---

<sup>1</sup>Department of Biostatistics, Boston University School of Public Health, Boston, Massachusetts, USA. <sup>2</sup>National Heart, Lung, and Blood Institute's Framingham Heart Study, Framingham, Massachusetts, USA. <sup>3</sup>Medical Research Council (MRC), Epidemiology Unit, Institute of Metabolic Science, Addenbrooke's Hospital, Cambridge, UK. <sup>4</sup>Oxford Centre for Diabetes, Endocrinology and Metabolism, University of Oxford, Oxford, UK. <sup>5</sup>Wellcome Trust Centre for Human Genetics, University of Oxford, Oxford, UK. <sup>6</sup>Program in Medical and Population Genetics, Broad Institute, Cambridge, Massachusetts, USA. <sup>7</sup>Center for Human Genetic Research, Massachusetts General Hospital, Boston, Massachusetts, USA. <sup>8</sup>Wellcome Trust Sanger Institute, Hinxton, Cambridge, UK. <sup>9</sup>Twin Research and Genetic Epidemiology Department, King's College London, St Thomas' Hospital Campus, London, UK. <sup>10</sup>Center for Statistical Genetics, Department of Biostatistics, University of Michigan School of Public Health, Ann Arbor, Michigan, USA. <sup>11</sup>Metabolic Disease Group, Wellcome Trust Sanger Institute, Hinxton, Cambridge, UK. <sup>12</sup>Cardiovascular Health Research Unit and Department of Medicine, University of Washington, Seattle, Washington, USA. <sup>13</sup>Centre National de la Recherche Scientifique–Unité Mixte de Recherche 8090, Pasteur Institute, Lille 2–Droit et Santé University, Lille, France. <sup>14</sup>Department of Medical Genetics, University of Lausanne, Lausanne, Switzerland. <sup>15</sup>University Institute of Social and Preventative Medicine, Centre Hospitalier Universitaire Vaudois (CHUV) and University of Lausanne, Lausanne, Switzerland. <sup>16</sup>Swiss Institute of Bioinformatics, Lausanne, Switzerland. <sup>17</sup>Department of Epidemiology and Public Health, Imperial College London, Faculty of Medicine, Norfolk Place, London, UK. <sup>18</sup>Boston University Data Coordinating Center, Boston, Massachusetts, USA. <sup>19</sup>deCODE Genetics, Reykjavik, Iceland. <sup>20</sup>Department of Human Genetics, Leiden University Medical Centre, Leiden, The Netherlands. <sup>21</sup>Institute of Epidemiology, Helmholtz Zentrum Muenchen, German Research Center for Environmental Health, Neuherberg, Germany. <sup>22</sup>Department of Epidemiology, Erasmus Medical College, Rotterdam, The Netherlands. <sup>23</sup>Department of Biological Psychology, VU University Amsterdam, Amsterdam, The Netherlands. <sup>24</sup>Centre for Population Health Sciences, University of Edinburgh, Edinburgh, UK. <sup>25</sup>MRC Human Genetics Unit, Institute of Genetics and Molecular Medicine, Edinburgh, UK. <sup>26</sup>Division of Genetics, Research and Development, GlaxoSmithKline, King of Prussia, Pennsylvania, USA. <sup>27</sup>Department of Cardiovascular Medicine, University of Oxford, Oxford, UK. <sup>28</sup>Genetics of Complex Traits, Institute of Biomedical and Clinical Sciences, Peninsula College of Medicine and Dentistry, University of Exeter, Exeter, UK. <sup>29</sup>National Institute of Aging, Baltimore, Maryland, USA. <sup>30</sup>Unit for Child and Adolescent Health and Welfare, National Institute for Health and Welfare, Biocenter Oulu, University of Oulu, Oulu, Finland. <sup>31</sup>Hagedorn Research Institute, Gentofte, Denmark. <sup>32</sup>Department of Medicine and Therapeutics, Level 7, Ninewells Hospital and Medical School, Dundee, UK. <sup>33</sup>Department of Epidemiology, Bloomberg School of Public Health, Johns Hopkins University, Baltimore, Maryland, USA. <sup>34</sup>Department of Nutrition–Dietetics, Harokopio University, Athens, Greece. <sup>35</sup>General Medicine Division, Massachusetts General Hospital, Boston, Massachusetts, USA. <sup>36</sup>Department of Epidemiology and Public Health, University College London, London, UK. <sup>37</sup>Departments of Nutrition and Epidemiology, Harvard School of Public Health, Boston, Massachusetts, USA. <sup>38</sup>MRC Centre for Causal Analyses in Translational Epidemiology, University of Bristol, Bristol, UK. <sup>39</sup>Fundación para la Investigación Biomédica del Hospital Clínico San Carlos, Madrid, Spain. <sup>40</sup>Departments of Medicine and Human Genetics, McGill University, Montreal, Canada. <sup>41</sup>Genome Quebec Innovation Centre, Montreal, Canada. <sup>42</sup>Department of Medical Epidemiology and Biostatistics, Karolinska Institutet, Stockholm, Sweden. <sup>43</sup>Department of Public Health and Caring Sciences, Uppsala University, Uppsala, Sweden. <sup>44</sup>Division of Statistical Genomics, Department of Genetics, Washington University School of Medicine, St. Louis, Missouri, USA. <sup>45</sup>Division of Endocrinology, Diabetes and Nutrition, University of Maryland School of Medicine, Baltimore, Maryland, USA. <sup>46</sup>INSERM U859, Université de Lille-Nord de France, Lille, France. <sup>47</sup>Genome Technology Branch, National Human Genome Research Institute, Bethesda, Maryland, USA. <sup>48</sup>The Broad Institute, Cambridge, Massachusetts, USA. <sup>49</sup>Leiden Genome Technology Center, Leiden University Medical Center, Leiden, The Netherlands. <sup>50</sup>INSERM U780, Paris Sud University, Villejuif, France. <sup>51</sup>The Heart Research Institute, Sydney, New South Wales, Australia. <sup>52</sup>PathWest Laboratory of Western Australia, Department of Molecular Genetics, J Block, QEII Medical Centre, Nedlands West Australia, Australia. <sup>53</sup>School of Surgery and Pathology, University of Western Australia, Nedlands West Australia, Australia. <sup>54</sup>Department of Social Medicine, University of Bristol, Bristol, UK. <sup>55</sup>Landsþitali University Hospital, Reykjavik, Iceland. <sup>56</sup>Icelandic Heart Association, Kopavogur, Iceland. <sup>57</sup>The Human Genetics Center and Institute of Molecular Medicine, University of

Texas Health Science Center, Houston, Texas, USA. <sup>58</sup>Steno Diabetes Center, Gentofte, Denmark. <sup>59</sup>Faculty of Health Science, University of Aarhus, Aarhus, Denmark. <sup>60</sup>Department of Medicine, University of Leipzig, Leipzig, Germany. <sup>61</sup>Endocrinology–Diabetology Unit, Corbeil-Essonnes Hospital, Essonnes, France. <sup>62</sup>Medical Genetics Institute, Cedars-Sinai Medical Center, Los Angeles, California, USA. <sup>63</sup>Clinical Trial Service Unit and Epidemiological Studies Unit, University of Oxford, Oxford, UK. <sup>64</sup>Centre for Genetic Epidemiology and Biostatistics, University of Western Australia, Perth, Australia. <sup>65</sup>Istituto di Neurogenetica e Neurofarmacologia (INN), Consiglio Nazionale delle Ricerche, c/o Cittadella Universitaria di Monserrato, Monserrato, Cagliari, Italy. <sup>66</sup>Western Australian Sleep Disorders Research Institute, Queen Elizabeth Medical Centre II, Perth, Australia. <sup>67</sup>Department of Endocrinology, Diabetes and Nutrition, Charite-Universitaetsmedizin Berlin, Berlin, Germany. <sup>68</sup>Department of Clinical Nutrition, German Institute of Human Nutrition Potsdam-Rehbruecke, Nuthetal, Germany. <sup>69</sup>Division of Endocrinology, Diabetes, and Hypertension, Brigham and Women’s Hospital, Harvard Medical School, Boston, Massachusetts, USA. <sup>70</sup>Department of Human Genetics, Leiden University Medical Centre, Leiden, The Netherlands. <sup>71</sup>Department of Cardiovascular Research, Istituto di Ricerche Farmacologiche ‘Mario Negri’, Milan, Italy. <sup>72</sup>Institut National de la Santé et de la Recherche Médicale, Institut National de la Recherche Agronomique, Université Paris 13, Bobigny Cedex, France. <sup>73</sup>Department of Medicine III, Division Prevention and Care of Diabetes, University of Dresden, Dresden, Germany. <sup>74</sup>Center for Human Nutrition, University of Texas Southwestern Medical Center, Dallas, Texas, USA. <sup>75</sup>Department of Genetics and Pathology, Rudbeck Laboratory, Uppsala University, Uppsala, Sweden. <sup>76</sup>Centre Hospitalier Universitaire, de Poitiers, Endocrinologie Diabetologie, CIC INSERM 0802, INSERM U927, Université de Poitiers, Unité de Formation et de Recherche, Médecine Pharmacie, Poitiers, France. <sup>77</sup>Department of Public Health and Clinical Medicine, Section for Nutritional Research, Umeå University, Umeå, Sweden. <sup>78</sup>Department of Clinical Sciences, Obstetrics and Gynecology, University of Oulu, University of Oulu, Finland. <sup>79</sup>Centre National de Génotypage/Institut de génomique/Commissariat à l’énergie atomique, Evry Cedex, France. <sup>80</sup>INSERM U872, Faculté de Médecine Paris Descartes, Paris Cedex, France. <sup>81</sup>Institute for Clinical Diabetology, German Diabetes Center, Leibniz Center for Diabetes Research at Heinrich Heine University Düsseldorf, Düsseldorf, Germany. <sup>82</sup>Institute of Genetic Medicine, European Academy Bozen/Bolzano (EURAC), Viale Druso, Bolzano, Italy, Affiliated Institute of the University Lübeck, Lübeck, Germany. <sup>83</sup>Department of Pulmonary Physiology, Sir Charles Gairdner Hospital, Perth, Australia. <sup>84</sup>Busselton Population Medical Research Foundation, Sir Charles Gairdner Hospital, Perth, Australia. <sup>85</sup>Heart Institute of Western Australia, Sir Charles Gairdner Hospital, Nedlands West Australia, Australia. <sup>86</sup>School of Medicine and Pharmacology, University of Western Australia, Nedlands West Australia, Australia. <sup>87</sup>Folkhalsan Research Centre, Helsinki, Finland. <sup>88</sup>Malmiska Municipal Health Care Center and Hospital, Jakobstad, Finland. <sup>89</sup>Nuffield Department of Surgery, University of Oxford, Oxford, UK. <sup>90</sup>Research Centre for Prevention and Health, Glostrup University Hospital, Glostrup, Denmark. <sup>91</sup>Faculty of Health Science, University of Copenhagen, Copenhagen, Denmark. <sup>92</sup>National Institute for Health and Welfare, Unit of Population Studies, Turku, Finland. <sup>93</sup>Institute of Health Sciences and Biocenter Oulu, University of Oulu, Oulu, Finland. <sup>94</sup>Department of Public Health, Faculty of Medicine, University of Helsinki, Helsinki, Finland. <sup>95</sup>National Institute for Health and Welfare, Unit for Child and Adolescent Mental Health, Helsinki, Finland. <sup>96</sup>Institute for Molecular Medicine Finland (FIMM), University of Helsinki, Helsinki, Finland. <sup>97</sup>Department of Internal Medicine and Biocenter Oulu, Oulu, Finland. <sup>98</sup>Diabetes Genetics, Institute of Biomedical and Clinical Science, Peninsula College of Medicine and Dentistry, University of Exeter, Exeter, UK. <sup>99</sup>National Institute for Health and Welfare, Unit of Living Conditions, Health and Wellbeing, Helsinki, Finland. <sup>100</sup>Interdisciplinary Centre for Clinical Research, University of Leipzig, Leipzig, Germany. <sup>101</sup>The Danish Twin Registry, Epidemiology, Institute of Public Health, University of Southern Denmark, Odense, Denmark. <sup>102</sup>Department of Clinical Sciences, Diabetes and Endocrinology, Lund University, University Hospital Malmö, Malmö, Sweden. <sup>103</sup>Gladstone Institute of Cardiovascular Disease, University of California, San Francisco, California, USA. <sup>104</sup>Diabetes Research Center, Diabetes Unit, Massachusetts General Hospital, Boston, Massachusetts, USA. <sup>105</sup>Department of Medicine, Harvard Medical School, Boston, Massachusetts, USA. <sup>106</sup>Division of Cardiology, University of Ottawa Heart Institute, Ottawa, Ontario, Canada. <sup>107</sup>Oxford National Institute for Health Research, Biomedical Research Centre, Churchill Hospital, Oxford, UK. <sup>108</sup>Department of Clinical Genetics, Erasmus Medical College, Rotterdam, The Netherlands. <sup>109</sup>Biomedical Research Institute, University of Dundee, Ninewells Hospital and Medical School, Dundee, UK. <sup>110</sup>Department of Geriatric Medicine and Metabolic Disease, Second University of Naples, Naples, Italy. <sup>111</sup>National Institute for Health and Welfare, Unit of Public Health Genomics, Helsinki, Finland. <sup>112</sup>Department of Medical Genetics, University of Helsinki, Helsinki, Finland. <sup>113</sup>Department of Medical Statistics, Epidemiology and Medical Informatics, Andrija Stampar School of Public Health, Medical School, University of Zagreb, Rockefellerova, Zagreb, Croatia. <sup>114</sup>Department of Clinical Genetics, VU University and Medical Center, Amsterdam, The Netherlands. <sup>115</sup>Department of Obstetrics and Gynaecology, Oulu University Hospital, Oulu, Finland. <sup>116</sup>Departments of Medicine, Epidemiology and Health

Services, University of Washington, Seattle, Washington, USA. <sup>117</sup>Group Health Research Institute, Group Health Cooperative, Seattle, Washington, USA. <sup>118</sup>Institute of Biometrics and Epidemiology, German Diabetes Centre, Leibniz Centre at Heinrich Heine University Düsseldorf, Düsseldorf, Germany. <sup>119</sup>Department of Biostatistics, University of Washington, Seattle, Washington, USA. <sup>120</sup>Department of Internal Medicine, Erasmus Medical College, Rotterdam, The Netherlands. <sup>121</sup>Department of Metabolic Diseases, Heinrich Heine University Düsseldorf, Düsseldorf, Germany. <sup>122</sup>Department of Public Health and Clinical Medicine, Section for Family Medicine, Umeå University, Umeå, Sweden. <sup>123</sup>School of Public Health, Department of General Practice, University of Aarhus, Aarhus, Denmark. <sup>124</sup>Department of Public Health and Primary Care, Strangeways Research Laboratory, University of Cambridge, Cambridge, UK. <sup>125</sup>MRC Epidemiology Resource Centre, University of Southampton, Southampton General Hospital, Southampton, UK. <sup>126</sup>Department of Epidemiology, University of Texas, M.D. Anderson Cancer Center, Houston, Texas, USA. <sup>127</sup>Leibniz-Institut für Arterioskleroseforschung an der Universität Münster, Münster, Germany. <sup>128</sup>Atherosclerosis Research Unit, Department of Medicine, Karolinska Institutet, Stockholm, Sweden. <sup>129</sup>Laboratory of Neurogenetics, National Institute on Aging, Bethesda, Maryland, USA. <sup>130</sup>Department of Epidemiology, University of Washington, Seattle, Washington, USA. <sup>131</sup>Seattle Epidemiologic Research and Information Center, Department of Veterans Affairs Office of Research and Development, Seattle, Washington, USA. <sup>132</sup>Department of Medical Sciences, Uppsala University, Uppsala, Sweden. <sup>133</sup>Medstar Research Institute, Baltimore, Maryland, USA. <sup>134</sup>Clinical Research Branch, National Institute on Aging, Baltimore, Maryland, USA. <sup>135</sup>Institut interrégional pour la santé (IRSA), La Riche, France. <sup>136</sup>Coordination Centre for Clinical Trials, University of Leipzig, Leipzig, Germany. <sup>137</sup>Department of Medicine, Helsinki University Hospital, University of Helsinki, Helsinki, Finland. <sup>138</sup>Department of Internal Medicine, Leiden University Medical Centre, Leiden, The Netherlands. <sup>139</sup>Research Unit, Cardiovascular Genetics, Nancy University Henri Poincaré, Nancy, France. <sup>140</sup>EMGO Institute for Health and Care Research, Department of Psychiatry, VU University Medical Center, Amsterdam, The Netherlands. <sup>141</sup>Department of Internal Medicine, Centre Hospitalier Universitaire Vaudois, Lausanne, Switzerland. <sup>142</sup>Genomic Medicine, Imperial College London, Hammersmith Hospital, London, UK. <sup>143</sup>Epidemiology and Public Health, Queen's University Belfast, Belfast, UK. <sup>144</sup>Medical Products Agency, Uppsala, Sweden. <sup>145</sup>See Supplementary Note for a full list of authors. <sup>146</sup>National Institute for Health and Welfare, Unit of Chronic Disease Epidemiology and Prevention, Helsinki, Finland. <sup>147</sup>Departments of Nutrition and Epidemiology, Harvard School of Public Health, Boston, Massachusetts, USA. <sup>148</sup>Channing Laboratory, Brigham and Women's Hospital and Harvard Medical School, Boston, Massachusetts, USA. <sup>149</sup>Genetic Epidemiology and Clinical Research Group, Department of Public Health and Clinical Medicine, Section for Medicine, Umeå University Hospital, Umeå, Sweden. <sup>150</sup>London School of Hygiene and Tropical Medicine, London, UK. <sup>151</sup>Department of Medicine, School of Medicine, Johns Hopkins University, Baltimore, Maryland, USA. <sup>152</sup>The Welch Center for Prevention, Epidemiology, and Clinical Research, School of Medicine and Bloomberg School of Public Health, Johns Hopkins University, Baltimore, Maryland, USA. <sup>153</sup>Division of Epidemiology and Community Health, School of Public Health, University of Minnesota, Minneapolis, Minnesota, USA. <sup>154</sup>Department of Endocrinology and Diabetes, Norfolk and Norwich University Hospital National Health Service Trust, Norwich, UK. <sup>155</sup>Department of Medicine, University of Kuopio and Kuopio University Hospital, Kuopio, Finland. <sup>156</sup>Faculty of Health Science, University of Southern Denmark, Odense, Denmark. <sup>157</sup>Institute of Biomedical Science, Faculty of Health Science, University of Copenhagen, Copenhagen, Denmark. <sup>158</sup>Department of Neurology, General Central Hospital, Bolzano, Italy. <sup>159</sup>Department of Neurology, University of Lübeck, Lübeck, Germany. <sup>160</sup>Institute of Medical Informatics, Biometry and Epidemiology, Ludwig-Maximilians-Universität, Munich, Germany. <sup>161</sup>Klinikum Grosshadern, Munich, Germany. <sup>162</sup>School of Medicine, University of Split, Split, Croatia. <sup>163</sup>Gen-Info Ltd., Zagreb, Croatia. <sup>164</sup>Department of Physiology and Biophysics, Keck School of Medicine, University of Southern California, Los Angeles, California, USA. <sup>165</sup>Department of Medicine, Division of Endocrinology, Keck School of Medicine, University of Southern California, Los Angeles, California, USA. <sup>166</sup>Department of Genetics, University of North Carolina, Chapel Hill, North Carolina, USA. <sup>167</sup>National Institute for Health and Welfare, Unit of Diabetes Prevention, Helsinki, Finland. <sup>168</sup>South Ostrobothnia Central Hospital, Seinäjoki, Finland. <sup>169</sup>Departments of Medicine and Epidemiology, University of Washington, Seattle, Washington, USA. <sup>170</sup>Longitudinal Studies Section, Clinical Research Branch, National Institute on Aging, NIH, Baltimore, Maryland, USA. <sup>171</sup>Faculty of Medicine, University of Iceland, Reykjavík, Iceland. <sup>172</sup>Lab of Cardiovascular Sciences, National Institute on Aging, National Institutes of Health, Baltimore, Maryland, USA. <sup>173</sup>Department of Clinical Sciences/Clinical Chemistry, University of Oulu, University of Oulu, Oulu, Finland. <sup>174</sup>National Institute of Health and Welfare, Oulu, Finland. <sup>175</sup>Department of Preventive Medicine, Keck School of Medicine, University of Southern California, Los Angeles, California, USA. <sup>176</sup>MRC–Health Protection Agency Centre for Environment and Health, Imperial College London, London, UK. <sup>177</sup>UOC Geriatria, Istituto Nazionale Ricovero e cura per Anziani (INRCA) IRCCS, Rome, Italy.

**Supplemental Table 1:** Comparison of ROC models where fasting time is included or is not included as a covariate

|                            | ROC AUC | $\chi^2$ value (comparison with null distribution) | <i>P</i> -value (comparison with null distribution) |
|----------------------------|---------|----------------------------------------------------|-----------------------------------------------------|
| Genetic model (1)          | 0.5805  | 80.9                                               | <1.0x10 <sup>-20</sup>                              |
| Genetic model (2)          | 0.5933  | 108.8                                              | <1.0x10 <sup>-20</sup>                              |
| NGRS_1 model (1)           | 0.5667  | 56.0                                               | 7.4x10 <sup>-14</sup>                               |
| NGRS_1 model (2)           | 0.5796  | 78.5                                               | <1.0x10 <sup>-20</sup>                              |
| NGRS_2 model (1)           | 0.6452  | 226.9                                              | <1.0x10 <sup>-20</sup>                              |
| NGRS_2 model (2)           | 0.6536  | 255.0                                              | <1.0x10 <sup>-20</sup>                              |
| NGRS_1 + genetic model (1) | 0.6070  | 144.8                                              | <1.0x10 <sup>-20</sup>                              |
| NGRS_1 + genetic model (2) | 0.6133  | 162.4                                              | <1.0x10 <sup>-20</sup>                              |
| NGRS_2 + genetic model (1) | 0.6621  | 291.0                                              | <1.0x10 <sup>-20</sup>                              |
| NGRS_2 + genetic model (2) | 0.6677  | 312.3                                              | <1.0x10 <sup>-20</sup>                              |

Model (1) is unadjusted for fasting time, whereas model (2) is. ROC AUC: Receiver operator characteristic area under the curve. NGRS\_1 comprised of age, sex, and type 2 diabetes family history. NGRS\_2 comprised of NGRS\_1 + baseline fasting and 2-hr glucose concentrations, triglycerides, diastolic and systolic blood pressures, and BMI. Genetic model comprised of fasting glucose and type 2 diabetes loci, as described in the Methods section.
